# Supplementary material
Source: Springer Nature journal article supplement (https://www.springermedizin.de/resource/supplementary/12961_2013_289_MOESM3_ESM.pdf/9570958)

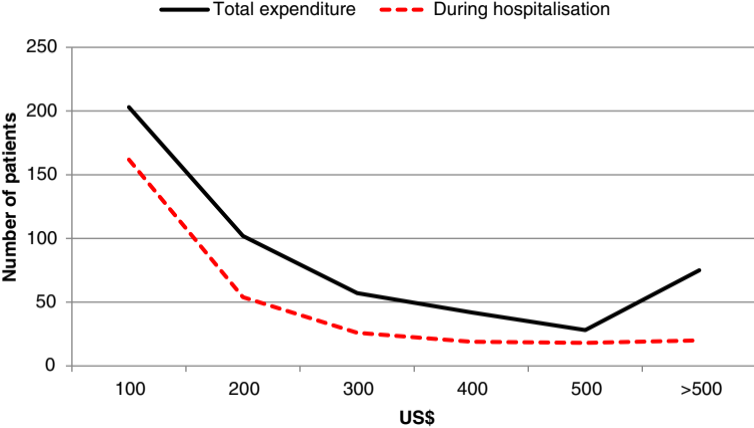

Supplement: MOESM3 [file 9570958]
